# Supplementary material for: Bulk vs. surface flame retardancy of fully bio-based polyamide 10,10
Source: Royal Society of Chemistry journal article supplement (doi:10.1039/c5ra04149j), 2015-01-01
Supplement: c5ra04149j1.pdf [file c5ra04149j1.pdf]

## Supporting Information

### Bulk vs. surface flame retardancy of fully bio-based polyamide 10,10

Daniele Battezzore, Jenny Alongi, Gaelle Fontaine, Alberto Frache, Serge Bourbigot, Giulio Malucelli

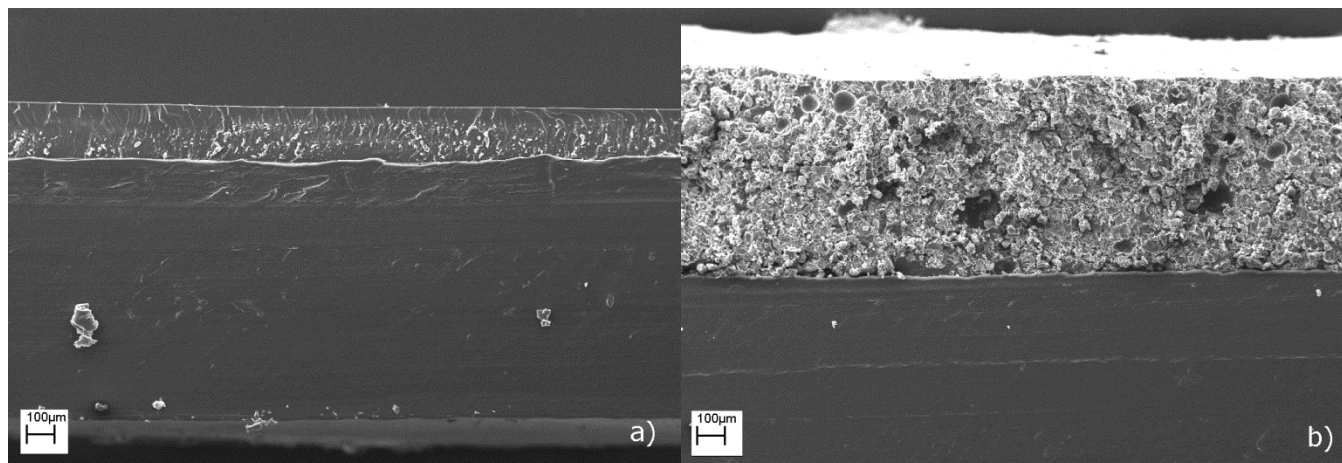

**Figure.** SEM micrographs of PA 10,10 coated with UV-curable resin (a) and UV-curable resin + ammonium polyphosphate (b)
